# Supplementary material
Source: PubMed Central journal article supplement (PMC4999941)
Supplement: JB.00320-16_zjb999094172so1.pdf [file JB.00320-16_zjb999094172so1.pdf]

**Construction of strains and plasmids.** Oligonucleotide primers used for genetic constructions are indicated in Table S3. All genetic constructs and chromosomal integrations were validated by DNA sequencing. Chromosomal integrations of *mVENUS* fusions to *dgcZ* wild-type or mutant variants were generated by standard  $\lambda$ RED-mediated recombineering (Datsenko and Wanner, 2000). The wild-type *dgcZ* gene was first replaced with a construct carrying the kanamycin resistance cassette fused to a counter-selectable marker (the L-rhamnose inducible *ccdB* toxin gene) and then it was substituted with PCR-generated fusions of *dgcZ* wild-type or mutant variants to *mVENUS*. Selection was performed on minimal medium agar plates containing 0.2 % L-rhamnose. *mCHERRY* fusions to *frdA* and *frdB* were generated using the same approach. The *dgcZ*(+) and *frdA*(+) strains were obtained by replacing the *PRham-ccdB-kan* element with the *dgcZ* and *frdA* genes amplified from *E. coli* MG1655. The  $\Delta$ *frdA*<sup>Frt</sup> strain was obtained by replacing the *PRham-ccdB-kan* element with *frdA::Frt* obtained by amplification from  $\Delta$ *frdA* strain of the Keio collection, after removal of the kanamycin resistance cassette. All integrations generated by  $\lambda$ RED-mediated recombineering were tested by DNA sequencing. To generate the *dgcZ-mVENUS* fusion, *mVENUS* was amplified from the plasmid template pDL-*mVENUS* (D. Cavalcanti De Lucena, unpublished) with the primers P3\_*dgcZ*\_mVenus\_optim and P4\_mVenus\_rev, and *dgcZ* with SacI\_NcoI\_*dgcZ*\_FWd and P2\_ *dgcZ*\_mVenus. The *dgcZ* fragment was then digested with SacI and EcoRI, and *mVENUS* with EcoRI and HindIII. Digested *dgcZ* and *mVENUS* fragments were inserted into the pBAD18 plasmid using the SacI and HindIII restriction sites. The resulting plasmid pBAD-DgcZ-mVENUS was used as template for PCR of the *dgcZ-mVENUS* construct applied for recombineering. As result of this cloning strategy, a DNA sequence of 93 nucleotides coding for a flexible linker of 31 amino acids (sequence provided by D. Cavalcanti De Lucena and indicated in Table S3) was inserted between *dgcZ* and the *mVENUS* coding region.

The plasmid carrying *yfbR-mCHERRY* was obtained by cloning *yfbR* and *mCHERRY* into pCJ30 (Bibikov et al., 1997). *yfbR* was amplified using *yfbR\_BamHI\_fwd* and *yfbR\_KpnI\_rev* primers and subsequently cutted with BamHI and KpnI. *mCHERRY* was amplified from pWBP20911mCherry (Charoenpanich et al., 2015) using *mCHERRY\_KpnI\_fwd* and *P4\_mVENUS\_rev* and cutted with KpnI and HindIII. Digested *yfbR* and *mCHERRY* fragments were inserted into the pCJ30 vector, cutted with KpnI and HindIII.

For bacterial two-hybrid (BACTH) assays, bait and prey sequences were inserted into vectors pKT25, pKNT25, pUT18, pUT18C (Battesti and Bouveret, 2012) using the restriction sites for BamHI and KpnI present on the plasmids.

## REFERENCES

- Battesti A, Bouveret E.** 2012. The bacterial two-hybrid system based on adenylate cyclase reconstitution in *Escherichia coli*. *Methods* **58**:325-334.
- Bibikov SI, Biran R, Rudd KE, Parkinson JS.** 1997. A signal transducer for aerotaxis in *Escherichia coli*. *J Bacteriol* **179**:4075-4079.
- Charoenpanich P, Soto MJ, Becker A, McIntosh M.** 2015. Quorum sensing restrains growth and is rapidly inactivated during domestication of *Sinorhizobium meliloti*. *Environ Microbiol Rep* **7**:373-382
- Datsenko KA, Wanner BL.** 2000. One-step inactivation of chromosomal genes in *Escherichia coli* K-12 using PCR products. *Proc Natl Acad Sci U S A* **97**:6640-6645

**MS-based protein identification.** Samples were digested in gel by the addition of Sequencing Grade Modified Trypsin (Promega) and incubation at 37 °C overnight, according to the manufacturers protocols. Peptides were eluted by using 200 µL MeCN for 30 min in a sonic-bath. Subsequently, the supernatant was transferred to a fresh tube and after evaporation of the solvent in a vacuum concentrator dry samples were dissolved in 25 µL 10 % acetonitrile/0.1 % TFA.

The mass spectrometric analysis of the samples was performed using an Orbitrap Velos Pro mass spectrometer (ThermoScientific). An Ultimate nanoRSLC-HPLC system (ThermoScientific), equipped with a home-made nano 1.8 µm C18 RP column was connected online to the mass spectrometer through a nanospray ion source. Depending on sample concentration, 1-15 µL of the tryptic digest were usually injected onto a C18 pre-concentration column. Automated trapping and desalting of the sample was performed at a flowrate of 6 µL/min using water/0.05 % formic acid as solvent.

Separation of the tryptic peptides was achieved with the following gradient of water/0.045 % formic acid (solvent A) and 80 % acetonitrile/0.05 % formic acid (solvent B) at a flow rate of 300 nL/min: holding 4 % B for five minutes, followed by a linear gradient to 45 % B within 30 minutes and linear increase to 95 % solvent B in additional 5 minutes. The column was connected to a stainless steel nanoemitter (ThermoScientific) and the eluent sprayed directly towards the heated capillary of the mass spectrometer using a potential of 2300 V. A survey scan with a resolution of 60000 within the Orbitrap mass analyzer was combined with at least three data-dependent MS/MS scans with dynamic exclusion for 30 s either using CID with the linear ion-trap or using HCD and orbitrap detection at a resolution of 7500.

Data analysis was performed using Proteome Discoverer (ThermoScientific) with SEQUEST and MASCOT (version 2.2; Matrix science) search engines using a user defined database containing the sequence of the protein of interest.

**TABLE S1 Bacterial strains**

| Strain designation | Genotype                                                                           | Reference                     |
|--------------------|------------------------------------------------------------------------------------|-------------------------------|
| MG1655             | Wt                                                                                 | (Blattner et al., 1997)       |
| Tr1-5              | <i>csrA::Tn5(kan)</i>                                                              | (Romeo et al., 1993)          |
| AB400              | <i>csrA::Tn5(kan)</i>                                                              | (Boehm et al., 2009)          |
| GL60               | <i>ibpA-mCherry::Frt-kan-Frt</i>                                                   | (Li and Young, 2012)          |
| AB1299             | <i>csrA::Tn5(kan), dgcZ(E208Q)</i>                                                 | (Zähringer et al., 2013)      |
| AB1484             | <i>csrA::Tn5(kan), dgcZ(E208Q), pgaD-3xFlag</i>                                    | (Zähringer et al., 2013)      |
| BTH101             |                                                                                    | (Battesti and Bouveret, 2012) |
| AB3348             | <i>dgcZ::PRha_ccdB-kan</i>                                                         | This work                     |
| AB3320             | <i>csrA::Tn5(kan), dgcZ(+)</i>                                                     | This work                     |
| AB3367             | <i>csrA::Tn5(kan), dgcZ-mVENUS</i>                                                 | This work                     |
| AB3401             | <i>csrA::Tn5(kan), dgcZ(+), pgaD-3xFlag</i>                                        | This work                     |
| AB3402             | <i>csrA::Tn5(kan), dgcZ-mVENUS, pgaD-3xFlag</i>                                    | This work                     |
| AB3321             | <i>csrA::Tn5(kan), ΔdgcZ::Frt</i>                                                  | This work                     |
| AB3403             | <i>csrA::Tn5(kan), dgcZ-mVENUS, ibpA-mCHERRY</i>                                   | This work                     |
| AB3411             | <i>csrA::Tn5(kan), dgcZ-mVENUS, frdA-mCHERRY</i>                                   | This work                     |
| AB3405             | <i>csrA::Tn5(kan), dgcZ-mVENUS, frdB-mCHERRY</i>                                   | This work                     |
| AB629              | <i>ΔdgcZ</i>                                                                       | This work                     |
| AB3369             | <i>ΔcpxR</i>                                                                       | This work                     |
| AB3372             | <i>ΔdgcZ, ΔcpxR</i>                                                                | This work                     |
| AB3408             | <i>csrA::Tn5(kan), dgcZ(H79L,H83L)-mVENUS</i>                                      | This work                     |
| AB3409             | <i>csrA::Tn5(kan), dgcZ(H79L,H83L,E208Q)-mVENUS</i>                                | This work                     |
| AB3412             | <i>csrA::Tn5(kan), dgcZ(H79L,H83L), pgaD-3xFlag</i>                                | This work                     |
| AB3389             | <i>ΔfrdA, csrA::Tn5(kan)</i>                                                       | This work                     |
| AB3391             | <i>ΔdgcZ, ΔfrdA, csrA::Tn5(kan)</i>                                                | This work                     |
| AB3390             | <i>ΔfrdB, csrA::Tn5(kan)</i>                                                       | This work                     |
| AB3413             | <i>frdA::ccdB-kan</i>                                                              | This work                     |
| AB3414             | <i>frdA::ccdB-kan, csrA::Frt</i>                                                   | This work                     |
| AB3415             | <i>frdA(+), csrA::Tn5</i>                                                          | This work                     |
| AB3416             | <i>ΔfrdA<sup>Frt</sup>, csrA::Tn5</i>                                              | This work                     |
| AB1718 (Δ7)        | <i>ΔpdeH, ΔpdeL, ΔpdeA, ΔpdeR, ΔpdeN, ΔpdeC, ΔpdeF</i>                             | This work                     |
| AB1872 (Δ9)        | <i>ΔpdeH, ΔpdeL, ΔpdeA, ΔpdeR, ΔpdeN, ΔpdeC, ΔpdeF, ΔpdeB, ΔpdeI</i>               | This work                     |
| AB3383             | <i>ΔpdeH, ΔpdeL, ΔpdeA, ΔpdeR, ΔpdeN, ΔpdeC, ΔpdeF, pgaD-3xFlag csrA::Tn5(kan)</i> | This work                     |

|                      |                                                                                                                                                                      |           |
|----------------------|----------------------------------------------------------------------------------------------------------------------------------------------------------------------|-----------|
| AB3384               | $\Delta pdeH, \Delta pdeL, \Delta pdeA, \Delta pdeR, \Delta pdeN, \Delta pdeC, \Delta pdeF,$<br>$\Delta pdeB, \Delta pdeI, pgaD-3xFlag, csrA::Tn5(kan)$              | This work |
| AB614                | $\Delta pdeI$                                                                                                                                                        | This work |
| AB613                | $\Delta pdeB$                                                                                                                                                        | This work |
| AB3420( $\Delta 2$ ) | $\Delta pdeI, \Delta pdeB$                                                                                                                                           | This work |
| AB3424               | $\Delta pdeI, csrA::Tn5(kan), pgaD-3xFlag$                                                                                                                           | This work |
| AB3425               | $\Delta pdeB, csrA::Tn5(kan), pgaD-3xFlag$                                                                                                                           | This work |
| AB3426               | $\Delta pdeI, \Delta pdeB, csrA::Tn5(kan), pgaD-3xFlag$                                                                                                              | This work |
| AB3427               | $\Delta pdeH, \Delta pdeL, \Delta pdeA, \Delta pdeR, \Delta pdeN, \Delta pdeC, \Delta pdeF,$<br>$\Delta pdeB, \Delta pdeI, pgaD-3xFlag, \Delta dgcZ$                 | This work |
| AB3428               | $\Delta pdeH, \Delta pdeL, \Delta pdeA, \Delta pdeR, \Delta pdeN, \Delta pdeC, \Delta pdeF,$<br>$\Delta pdeB, \Delta pdeI, pgaD-3xFlag, \Delta dgcZ, csrA::Tn5(kan)$ | This work |

---

TABLE S1 References

- Blattner FR, Plunkett G, Bloch CA, Perna NT, Burland V, Riley M, Collado-Vides J, Glasner JD, Rode CK, Mayhew GF, Gregor J, Davis NW, Kirkpatrick HA, Goeden MA, Rose DJ, Mau B, Shao Y.** 1997. The complete genome sequence of *Escherichia coli* K-12. *Science* **277**:1453-1462.
- Romeo T, Gong M, Liu MY, Brun-Zinkernagel AM.** 1993. Identification and molecular characterization of *csrA*, a pleiotropic gene from *Escherichia coli* that affects glycogen biosynthesis, gluconeogenesis, cell size, and surface properties. *J Bacteriol* **175**:4744-4755.
- Boehm A, Steiner S, Zähringer F, Casanova A, Hamburger F, Ritz D, Keck W, Ackermann M, Schirmer T, Jenal U.** 2009. Second messenger signalling governs *Escherichia coli* biofilm induction upon ribosomal stress. *Mol Microbiol* **72**:1500-1516.
- Li G, Young KD.** 2012. Isolation and identification of new inner membrane-associated proteins that localize to cell poles in *Escherichia coli*. *Mol Microbiol* **84**:276-295.
- Zähringer F, Lacanna E, Jenal U, Schirmer T, Boehm A.** 2013. Structure and signaling mechanism of a zinc-sensory diguanylate cyclase. *Structure* **21**:1149-1157.
- Battesti A, Bouveret E.** 2012. The bacterial two-hybrid system based on adenylate cyclase reconstitution in *Escherichia coli*. *Methods* **58**:325-334.

**TABLE S2 Plasmids**

| Plasmid name       | Feature                                                            | Reference                     |
|--------------------|--------------------------------------------------------------------|-------------------------------|
| pBAD18             | Expression vector                                                  | (Guzman et al., 1995)         |
| pDL-mVENUS         | Vector used for amplification of mVENUS template                   | *                             |
| pWBP20911          | Vector used for amplification of mCHERRY template                  | (Charoenpanich et al., 2015)  |
| pDgcZ              | Expression vector (pBAD18) for <i>dgcZ</i>                         | This work                     |
| pDgcZ-mVENUS       | Expression vector (pBAD18) for <i>mVENUS</i> fusion to <i>dgcZ</i> | This work                     |
| pCJ30              | Expression vector                                                  | (Bibikov et al., 1997)        |
| pCJ30-YfbR-mCHERRY | Expression vector for <i>mCHERRY</i> fusion to <i>yfbR</i>         | This work                     |
| pNlpE              | Expression vector (pCJ30) for <i>nlpE</i>                          | This work                     |
| pKT25              | Standard plasmid for bacterial two-hybrid                          | (Battesti and Bouveret, 2012) |
| pKNT25             | Standard plasmid for bacterial two-hybrid                          | (Battesti and Bouveret, 2012) |
| pUT18              | Standard plasmid for bacterial two-hybrid                          | (Battesti and Bouveret, 2012) |
| pUT18C             | Standard plasmid for bacterial two-hybrid                          | (Battesti and Bouveret, 2012) |
| pUT18-zip          | Standard plasmid for bacterial two-hybrid                          | (Battesti and Bouveret, 2012) |
| pKT25-zip          | Standard plasmid for bacterial two-hybrid                          | (Battesti and Bouveret, 2012) |
| pKT25-DgcZ         | Plasmid for bacterial two-hybrid                                   | This work                     |
| pKT25-CZB          | Plasmid for bacterial two-hybrid                                   | This work                     |
| pKT25-GGDEF        | Plasmid for bacterial two-hybrid                                   | This work                     |
| pKT25-FrdA         | Plasmid for bacterial two-hybrid                                   | This work                     |
| pKT25-FrdB         | Plasmid for bacterial two-hybrid                                   | This work                     |
| pKNT25-DgcZ        | Plasmid for bacterial two-hybrid                                   | This work                     |
| pKNT25-FrdA        | Plasmid for bacterial two-hybrid                                   | This work                     |
| pKNT25-FrdB        | Plasmid for bacterial two-hybrid                                   | This work                     |
| pUT18-DgcZ         | Plasmid for bacterial two-hybrid                                   | This work                     |
| pUT18-FrdA         | Plasmid for bacterial two-hybrid                                   | This work                     |

|             |                                  |           |
|-------------|----------------------------------|-----------|
| pUT18-FrdB  | Plasmid for bacterial two-hybrid | This work |
| pUT18C-DgcZ | Plasmid for bacterial two-hybrid | This work |
| pUT18C-FrdA | Plasmid for bacterial two-hybrid | This work |
| pUT18C-FrdB | Plasmid for bacterial two-hybrid | This work |

---

TABLE S2 References

**Bibikov SI, Biran R, Rudd KE, Parkinson JS.** 1997. A signal transducer for aerotaxis in *Escherichia coli*. *J Bacteriol* **179**:4075-4079.

**Charoenpanich P, Soto MJ, Becker A, McIntosh M.** 2015. Quorum sensing restrains growth and is rapidly inactivated during domestication of *Sinorhizobium meliloti*. *Environ Microbiol Rep* **7**:373-382.

**Guzman LM, Belin D, Carson MJ, Beckwith J.** 1995. Tight regulation, modulation, and high-level expression by vectors containing the arabinose PBAD promoter. *J Bacteriol* **177**:4121-4130.

**Battesti A, Bouveret E.** 2012. The bacterial two-hybrid system based on adenylate cyclase reconstitution in *Escherichia coli*. *Methods* **58**:325-334

\* Gifted from Daniella Cavalcanti de Lucena (unpublished)

**TABLE S3 Primers**

| Primer name              | Sequence                                                                                       | Use                                                           |
|--------------------------|------------------------------------------------------------------------------------------------|---------------------------------------------------------------|
| dgcZ-pKD45_rev_new       | GAATCGTTGACACAGTAGCA<br>TCAGTTTTCTCAATGAATGT<br>TAAACGGAGCacccggatat tatcgtgaggatgcG           | Generation of <i>dgcZ::PRha-ccdb-kan</i> strain               |
| dgcZ_KO_pKD45_fwd        | Gatcaagaagacaacggaaa ttgatgccatctgtgtaa<br>ctcaatTCATTTGAAACCCC AGAGTCCCCG                     | Generation of <i>dgcZ::PRha-ccdb-kan</i> strain               |
| 1651-dgcZ_test_fwd       | Gccggaccagatgatcaaca ttagtgg                                                                   | Generation of <i>dgcZ(+)</i> strain                           |
| 1652-dgcZ_test_rev       | tgactaatgaacggagataatccctcacc                                                                  | Generation of <i>dgcZ(+)</i> strain                           |
| SacI_NcoI_dgcZ_FWd       | tatagagctcGGAGTGCCAT GGatgATCAAGAAGACAACG<br>GAAATTGATG                                        | Generation of <i>dgcZ-mVENUS</i> strain and cloning in pBAD18 |
| P2_dgcZ_mVenus           | GGGGGAATTCGGTACCCATC<br>CTAGGAATCTCCTTTCTAGA<br>atgAACTCGGTTAATCACAT TTTGTTCGTCA               | Generation of <i>dgcZ-mVENUS</i> strain and cloning in pBAD18 |
| P3_dgcZ_mVenus_opti<br>m | Taccgaattccccctcgata tcgggcccggcctatctggc<br>ctgggagctggacttcctc actgATGGTGAGCAAGGGCG<br>AGGAG | Generation of <i>dgcZ-mVENUS</i> strain and cloning in pBAD18 |
| P4_mVenus_rev            | tataAAGCTTTTACTTGTAC AGCTCGTCCATGCCG                                                           | Generation of <i>dgcZ-mVENUS</i> strain and cloning in pBAD18 |
| P0_dgcZ_fwd_recomb       | ACTGTGAAAAAGGAGTGGA<br>ATGATCAAGAAGACAACGGA AATTGATG                                           | Recombination of <i>dgcZ-mVENUS</i> strain and mutants        |
| P5_mVenus_recomb         | GAATCGTTGACACAGTAGCA<br>TCAGTTTTCTCAATGAATGT<br>TAAACGGAGCtataAAGCTT<br>TACTTGTACAGCTCGTCCA    | Recombination of <i>dgcZ-mVENUS</i> strain and mutants        |
| dgcZ_E208Q_fwd           | CGCTACGGGGGCCAAGAATT TATC                                                                      | Generation of <i>dgcZ(H79L,H83L,E208Q)-mVENUS</i> fusion      |
| dgcZ_E208Q_rev           | GATAAATTCTTGCCCCCGT AGCG                                                                       | Generation of <i>dgcZ(H79L,H83L,E208Q)-mVENUS</i> fusion      |
| dgcZ_H83L_fwd            | caacatatgCTTaaactgtgg tcggg                                                                    | Generation of                                                 |



|                               |                                                                                       |                                                                   |
|-------------------------------|---------------------------------------------------------------------------------------|-------------------------------------------------------------------|
|                               |                                                                                       | <i>dgcZ</i> (H79L,H83L)-<br><i>mVENUS</i> fusion                  |
| <i>dgcZ_H83L_rev</i>          | cccgaccacagttAAGcata tgttg                                                            | Generation of<br><i>dgcZ</i> (H79L,H83L)-<br><i>mVENUS</i> fusion |
| <i>frdA_pkd45_fwd</i>         | CTTACCCTGAAGTACGTGGC<br>TGTGGGATAAAAACAATCTG GAGGAATGTCcatttcgaa<br>ccccagagtcccgc    | Generation of <i>frdA::PRha-</i><br><i>ccdb-kan</i> strain        |
| <i>frdA_pkd45_rev(2)</i>      | CCACCTCAATTTTCAGGTTT TTCATCtcaGCcatTCGCCT<br>TCTCCTTCTTaccggatat tatcgtgaggatgcG      | Generation of <i>frdA::PRha-</i><br><i>ccdb-kan</i> strain        |
| <i>frdA_mCHERRY_fwd</i>       | CTTACCCTGAAGTACGTGGC<br>TGTGGGATAAAAACAATCTG<br>GAGGAATGTCgtgCAAACCT TTCAAGCCGATCTTG  | Generation of <i>frdA-</i><br><i>mCHERRY</i> strain               |
| <i>frdA_mCHERRY_rev2</i>      | CCACCTCAATTTTCAGGTTT TTCATCtcaGCcatTCGCCT<br>TCTCCTTCTtactgttaca gctcgtccatgcc        | Generation of <i>frdA-</i><br><i>mCHERRY</i> strain               |
| <i>FrdA_fwd</i>               | CAGGTACTTACCCTGAAGTACGTGGCT                                                           | Generation of <i>frdB::Frt</i> and<br><i>frdB(+)</i> strain       |
| <i>frdA_rev_recom</i>         | GTCATAAGGCACTTCATAGAATGCGCT                                                           | Generation of <i>frdB::Frt</i> and<br><i>frdB(+)</i> strain       |
| <i>frdB_pkd45_fwd</i>         | AGCGGATGCAGCCGATAAGG<br>CGGAAGCAGCCAATAAGAAG GAGAAGGCGAAtcatttcgaa<br>ccccagagtcccgc  | Generation of <i>frdB::PRha-</i><br><i>ccdb-kan</i> strain        |
| <i>frdB_pkd45_rev</i>         | ACGTCATTGGCCGTACATAC<br>GGTTTACGTTTAGTCGTCAT GTTGCACTCCaccggatat<br>tatcgtgaggatgcG   | Generation of <i>frdB::PRha-</i><br><i>ccdb-kan</i> strain        |
| <i>frdB_mCHERRY_fwd</i>       | AGCGGATGCAGCCGATAAGG<br>CGGAAGCAGCCAATAAGAAG<br>GAGAAGGCGAatgGCTGAGA TGAAAAACCTGAAAAT | Generation of <i>frdB-</i><br><i>mCHERRY</i> strain               |
| <i>frdB_mCHERRY_rev</i>       | ACGTCATTGGCCGTACATAC<br>GGTTTACGTTTAGTCGTCAT GTTGCACTCCtactgttac<br>agctcgtccatgcc    | Generation of <i>frdB-</i><br><i>mCHERRY</i> strain               |
| <i>dgcZ_HindIII_rev</i>       | atatAAGCTTttaaACTCGGTTAATCACATTTTGTTCGTC                                              | Cloning of <i>dgcZ</i> in pBAD18                                  |
| <i>SacI_NcoI_dgcZ_FWd</i>     | tatagagctcGGAGTGCCATGGatgATCAAGAAGACAACGG<br>AAATTGATG                                | Cloning of <i>dgcZ</i> in pBAD18                                  |
| <i>nlpE_pcj30_BamHI_fwd</i>   | GCTGCAGGATCCGGTGAAAA<br>AAGCGATAGTGACAGCGA                                            | Cloning of <i>nlpE</i> in pCJ30                                   |
| <i>nlpE_pcj30_HindIII_rev</i> | CCAAGCTTGttaaCTGCCCA AACTACTGCAATCC                                                   | Cloning of <i>nlpE</i> in pCJ30                                   |

---

|                                                  |                                                                                                |                                                                                                   |
|--------------------------------------------------|------------------------------------------------------------------------------------------------|---------------------------------------------------------------------------------------------------|
| yfbR_BamHI_fwd                                   | CTAGAGGATCCCAAACAGAG<br>CCATTTCTTTGCCCATCT                                                     | Cloning of <i>yfbR-mCHERRY</i> in pCJ30. In addition, primer P4_mVENUS_rev was used               |
| yfbR_KpnI_rev                                    | CTTAGGTACCcgAGCGGTGA ATCCTGGCTAATCTCAT                                                         | Cloning of <i>yfbR-mCHERRY</i> in pCJ30. In addition, primer P4_mVENUS_rev was used               |
| mCHERRY_KpnI_fwd                                 | cgGGTACCGGTGAGCAAGGG CGAGGAGCTG                                                                | Cloning of <i>yfbR-mCHERRY</i> in pCJ30. In addition, primer P4_mVENUS_rev was used               |
| dgcZ_BamHI_fwd                                   | tataGGATCCAatgATCAAG AAGACAACGGAAATTGATG                                                       | Cloning of <i>dgcZ</i> in BTH plasmids                                                            |
| dgcZ_KpnI_rev                                    | CTTAGGTACCcgAACTCGGT<br>TAATCACATTTTGTTCGTCA                                                   | Cloning of <i>dgcZ</i> in BTH plasmids                                                            |
| CZB_KpnI_rev                                     | CTTAGGTACCcgGCTACGGA TCGTCAGCAAATAAATTT                                                        | Cloning of CZB domain of <i>dgcZ</i> in BTH plasmids. <i>dgcZ_BamHI_fwd</i> was used in addition  |
| GGDEF_BamHI_fwd                                  | CTAGAGGATCCCGGAGTGCC<br>TGTGatgAATATGGATGTTT TGACGGGATTGC                                      | Cloning of GGDEF domain of <i>dgcZ</i> in BTH plasmids. <i>DgcZ_KpnI_rev</i> was used in addition |
| frdA_BamHI_fwd                                   | CTAGAGGATCCCAAACCTT TCAAGCCGATCTTGC                                                            | Cloning of <i>frdA</i> in BTH plasmids.                                                           |
| frdA_KpnI_rev                                    | CTTAGGTACCcgGCCATTCG CCTTCTCCTTCTTATTG                                                         | Cloning of <i>frdA</i> in BTH plasmids.                                                           |
| frdB_BamHI_fwd                                   | CTAGAGGATCCCGCTGAGAT<br>GAAAAACCTGAAAATTGAGG T                                                 | Cloning of <i>frdB</i> in BTH plasmids.                                                           |
| frdB_KpnI_rev                                    | CTTAGGTACCcgGCCATTCG CCTTCTCCTTCTTATTG                                                         | Cloning of <i>frdB</i> in BTH plasmids.                                                           |
| Linker used for the <i>dgcZ-mVENUS</i> construct | catTCTAGAAAGGAGATTCTAGGATGGGTACCgaattccc<br>cctcgatatcgggcccggcctatctggcctgggagctggactcctcactg |                                                                                                   |

---

**Table S4 (accompanying Excel file) Putative DgcZ-3xFLAG protein interaction partners identified by Co-immunoprecipitation (CoIP).** The file contains two sheets listing results from CoIPs in stationary and exponential phase. Each sheet contains two lists: i) candidates identified at least by two unique peptides and three peptides and ii) candidates identified by less unique peptides / peptides. The lists are sorted according to the parameter “Area” which gives a measure of the relative abundances of the proteins in the sample. None of the candidates was identified in any of the negative control CoIPs. Column  $\Sigma$ Coverage indicates the percentages of the protein sequence covered by identified peptides. Column  $\Sigma$ #Proteins lists the number of proteins that contains the identified peptides, i.e. 1 indicates that the identified peptides can be unequivocally assigned to one specific protein. Column  $\Sigma$ # Unique Peptides indicates the number of distinct unique peptides identified for each protein. Column  $\Sigma$ # Peptides indicates the number of peptide sequences identified. Column  $\Sigma$ # PSMs shows the total number of identified peptide sequences (PSM = peptide spectrum matches) for the protein, including those redundantly identified. Column #AAs lists the number of amino acids of each identified protein.

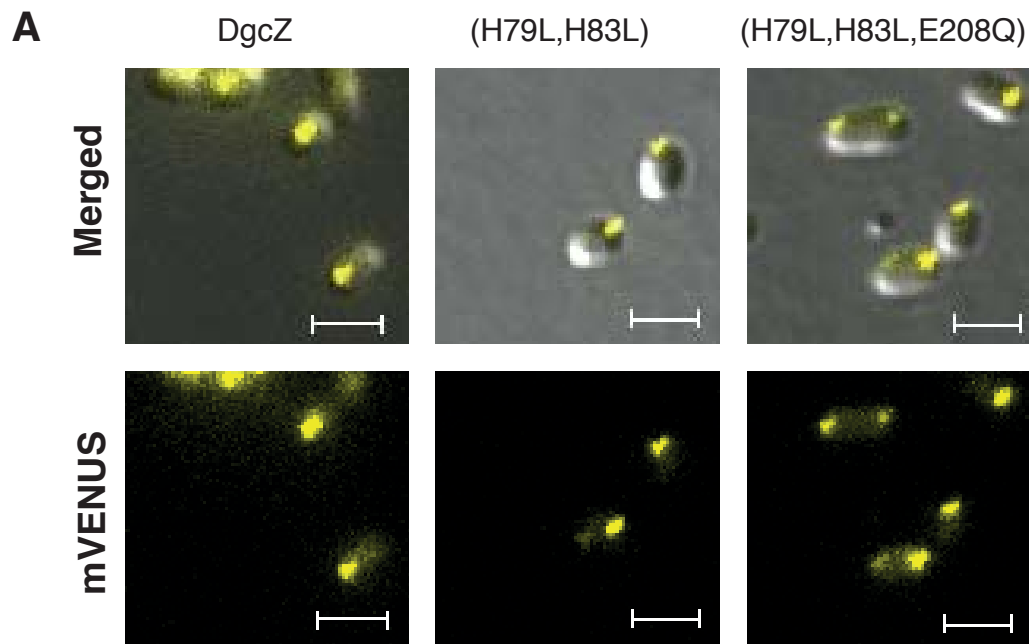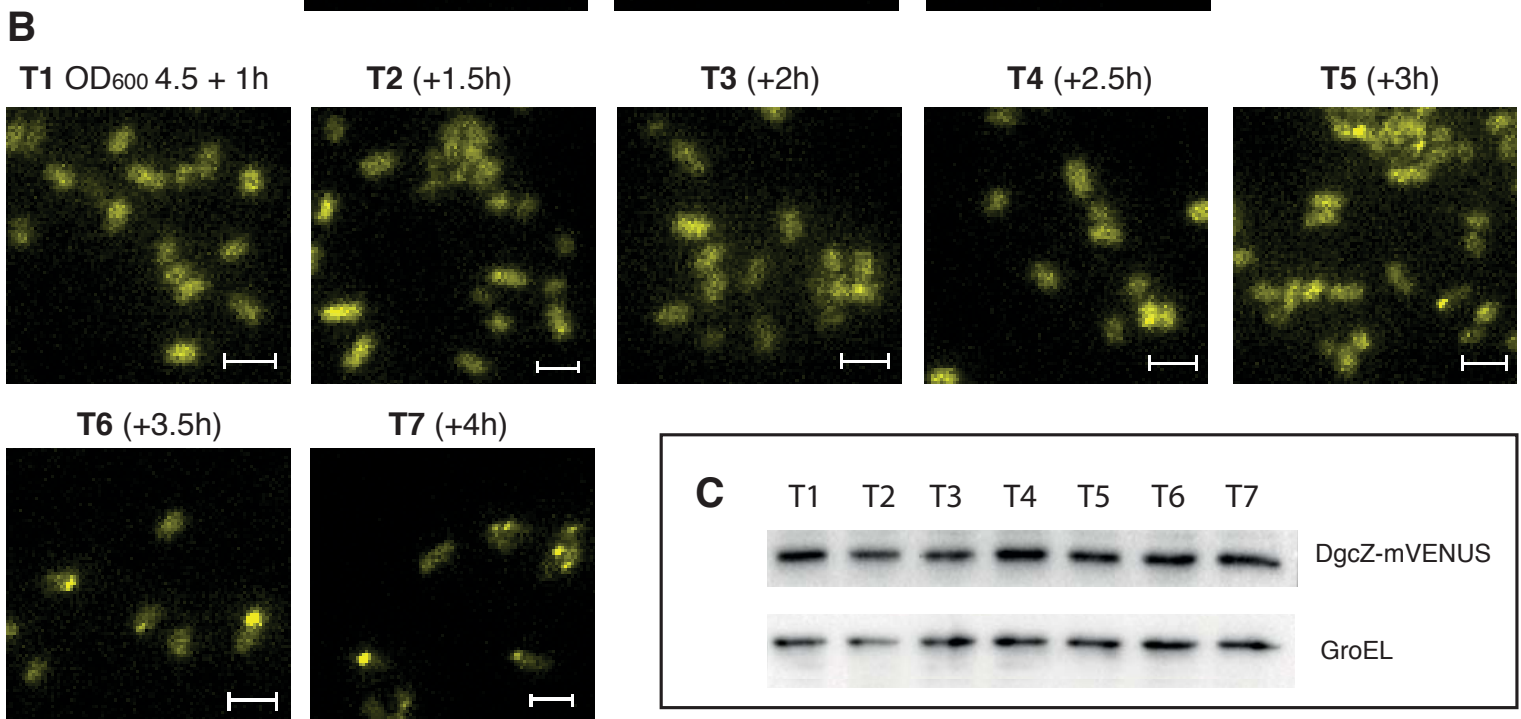

FIG S1 Polar localization of DgcZ is not controlled by protein activity or concentration. (A) Localization of wild-type, hyperactive (H79L, H83L) and inactive (H79L, H83L, E208Q) DgcZ protein fused to mVENUS. The constructs encoding the mVENUS fusions were chromosomally integrated at the native *dgcZ* locus. All strains carry *csrA::Tn5*. Size bars are 2  $\mu$ m and are identical in each picture. (B) DgcZ-mVENUS localization in the *csrA::Tn5/dgcZ-mVENUS* strain grown in LB medium at 37 °C. Pictures and protein aliquots were taken every 30 minutes starting 1 hour after the bacterial culture reached an OD<sub>600</sub> of 4.5. Size bars as (A). (C) Western blot detection of DgcZ and GroEL protein extracted during the experiment shown in panel B.

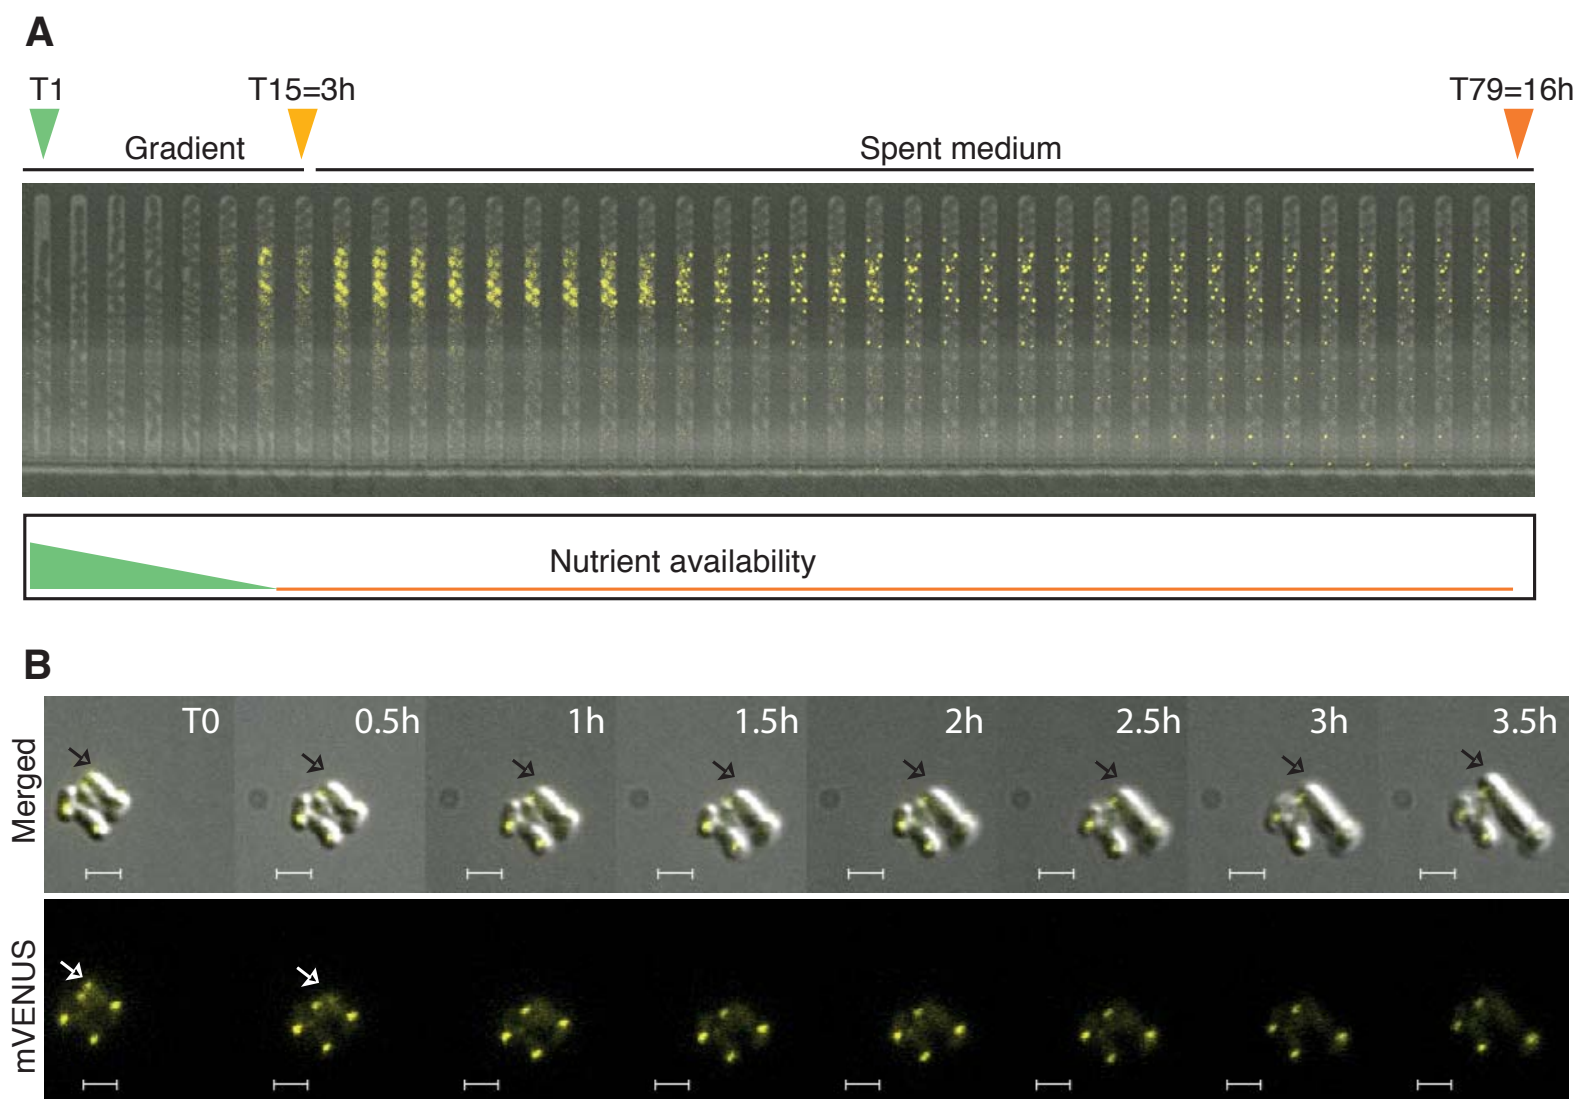

FIG S2 DgcZ polar foci are observed in non-dividing bacteria and vanish upon nutrient addition before growth resumes. (A) Fluorescence microscopy of the *dgcZ-mVENUS/ibpA-mCHERRY/csrA::Tn5* strain in microfluidic chambers. An excerpt of the experiment (described in Materials and Methods) representing the 3 hours phase of the gradient from fresh to spent medium followed by 13 hours of spent medium is shown. The image represents a montage of pictures taken every 24 minutes. (B) Fluorescence microscopy of the *dgcZ-mVENUS/csrA::Tn5* strain. Bacteria from stationary phase (48 h) were spotted onto a microscopy slide (LB, 1 % agarose) and images were taken every 30 minutes. White arrows indicate a DgcZ focus that disappeared when cells resumed growth. The respective bacterial cell is indicated by black arrows in the merged channel (DIC + mVENUS). Size bars are 2  $\mu\text{m}$  and are identical in each picture.

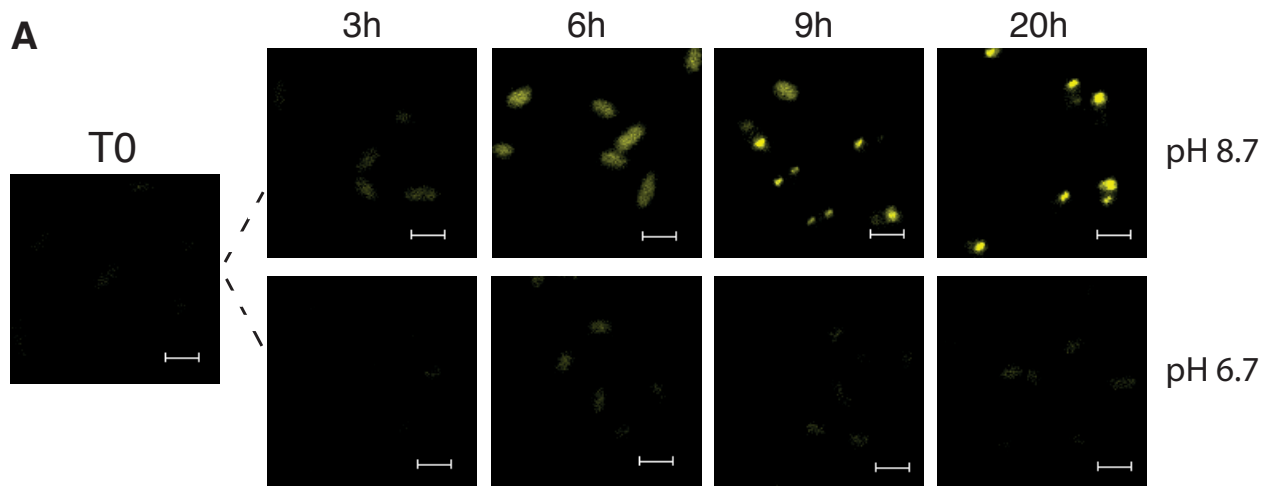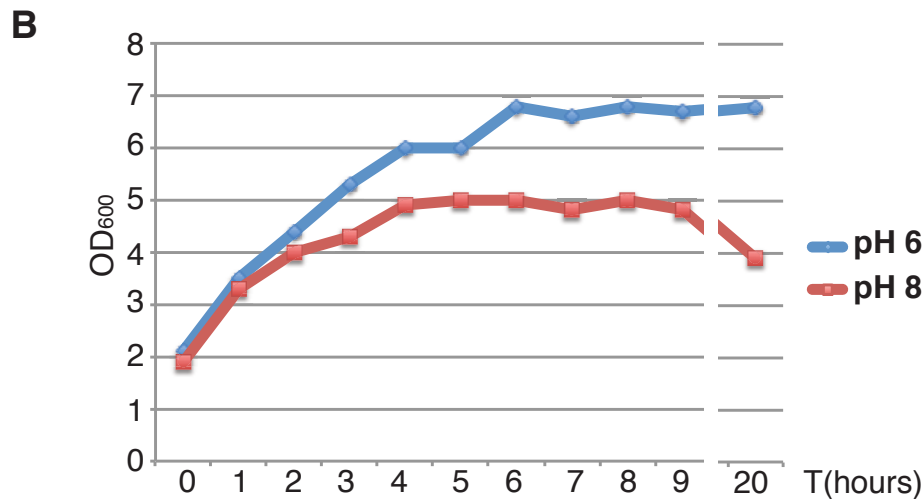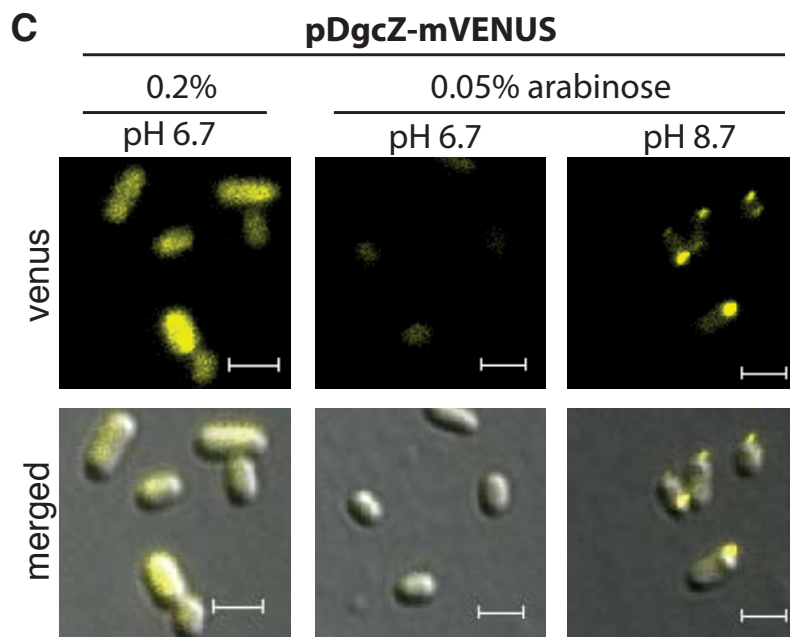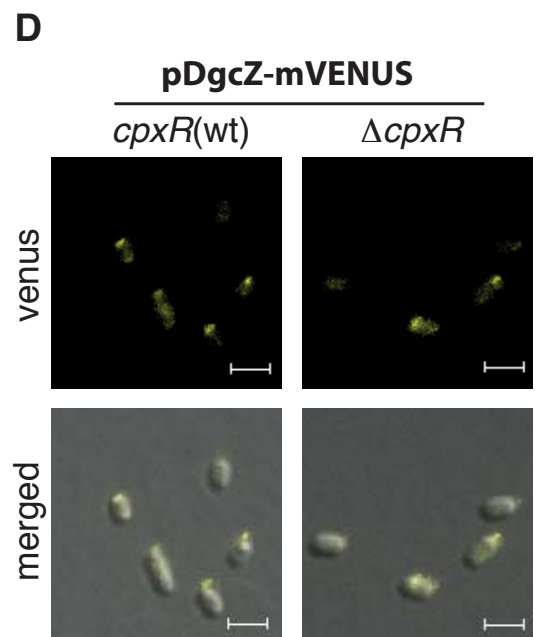

FIG S3 Localization of the DgcZ-mVENUS protein at different pH. (A) *E. coli* *dgcZ-mVENUS* / *csrA::Tn5* was grown in LB medium until OD<sub>600</sub> of 2.5 and then diluted (1:100) in buffered LB medium at pH 6.7 or 8.7 and grown at 37 °C under shaking conditions. Fluorescence microscopy images were taken after 3, 6, 9 and 20 hours. (B) Growth curves from the experiment shown in panel A. (C) Microscopy pictures of *E. coli* MG1655 transformed with pDgcZ-mVENUS and grown in buffered LB medium at pH 6.7 or 8.7 at 37 °C for 24 hours until the cultures reached stationary phase. The medium was supplemented with 100 μg/ml ampicillin and 0.2% or 0.05 % arabinose was added to induce expression of *dgcZ-mVENUS*. (D) Fluorescence microscopy images of *E. coli* MG1655 *cpxR*(wt) and  $\Delta$ *cpxR* transformed with pDgcZ-mVENUS and grown in LB medium at 37 °C for 24 hours. LB was supplemented with 0.02 % arabinose and ampicillin. Size bars are 2 μm and identical in each picture.

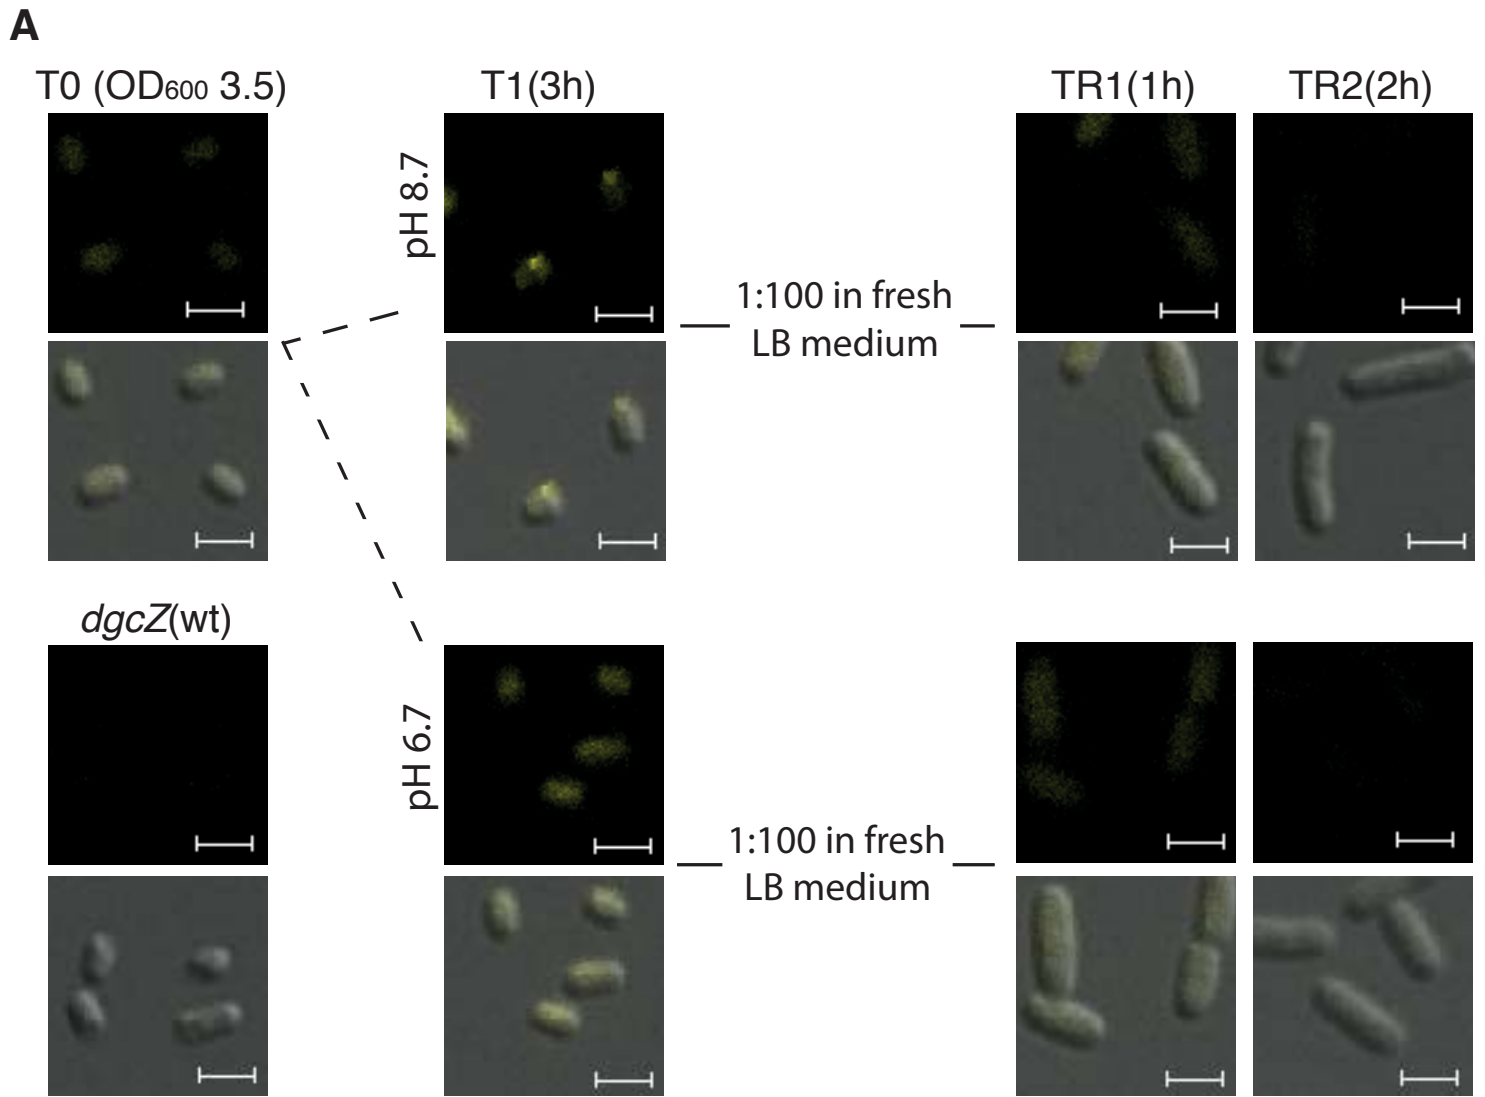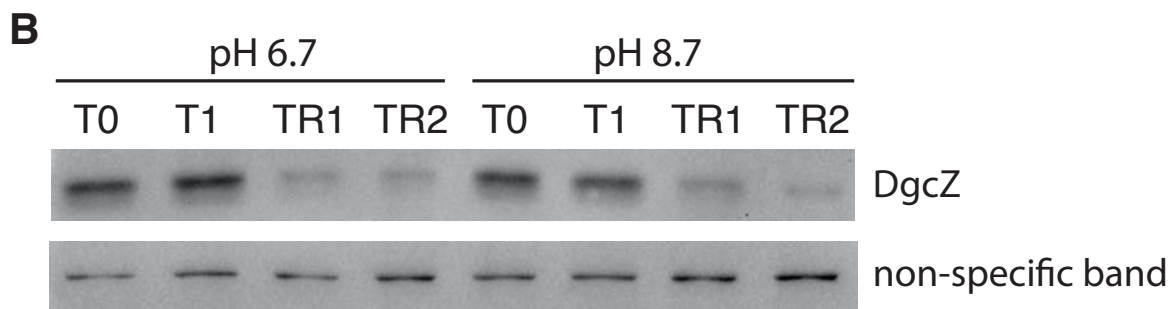

FIG S4 Decrease in DgcZ-mVENUS levels upon dilution of bacterial cultures in fresh LB medium. (A) *E. coli dgcZ-mVENUS/csrA::Tn5* was grown in 20 ml LB medium until OD<sub>600</sub> of 3.5, then transferred (washed and resuspended in the same volume of medium) to buffered (K<sub>2</sub>HPO<sub>4</sub> 50 mM, KH<sub>2</sub>PO<sub>4</sub> 15 mM) spent LB medium at pH 6.7 or 8.7 and cultivated under shaking conditions at 37 °C. After 3 hours both samples were diluted (1:100) in fresh (unbuffered) LB medium and cultivated for two hours. Microscopy pictures were taken at the time points indicated in the figure. Size bars are 2 μm and are identical in each picture. (B) Western blot detection of DgcZ in protein samples extracted in the experiment described in (A). As a negative control, a non-specific band detected by the anti-DgcZ antibody is shown.



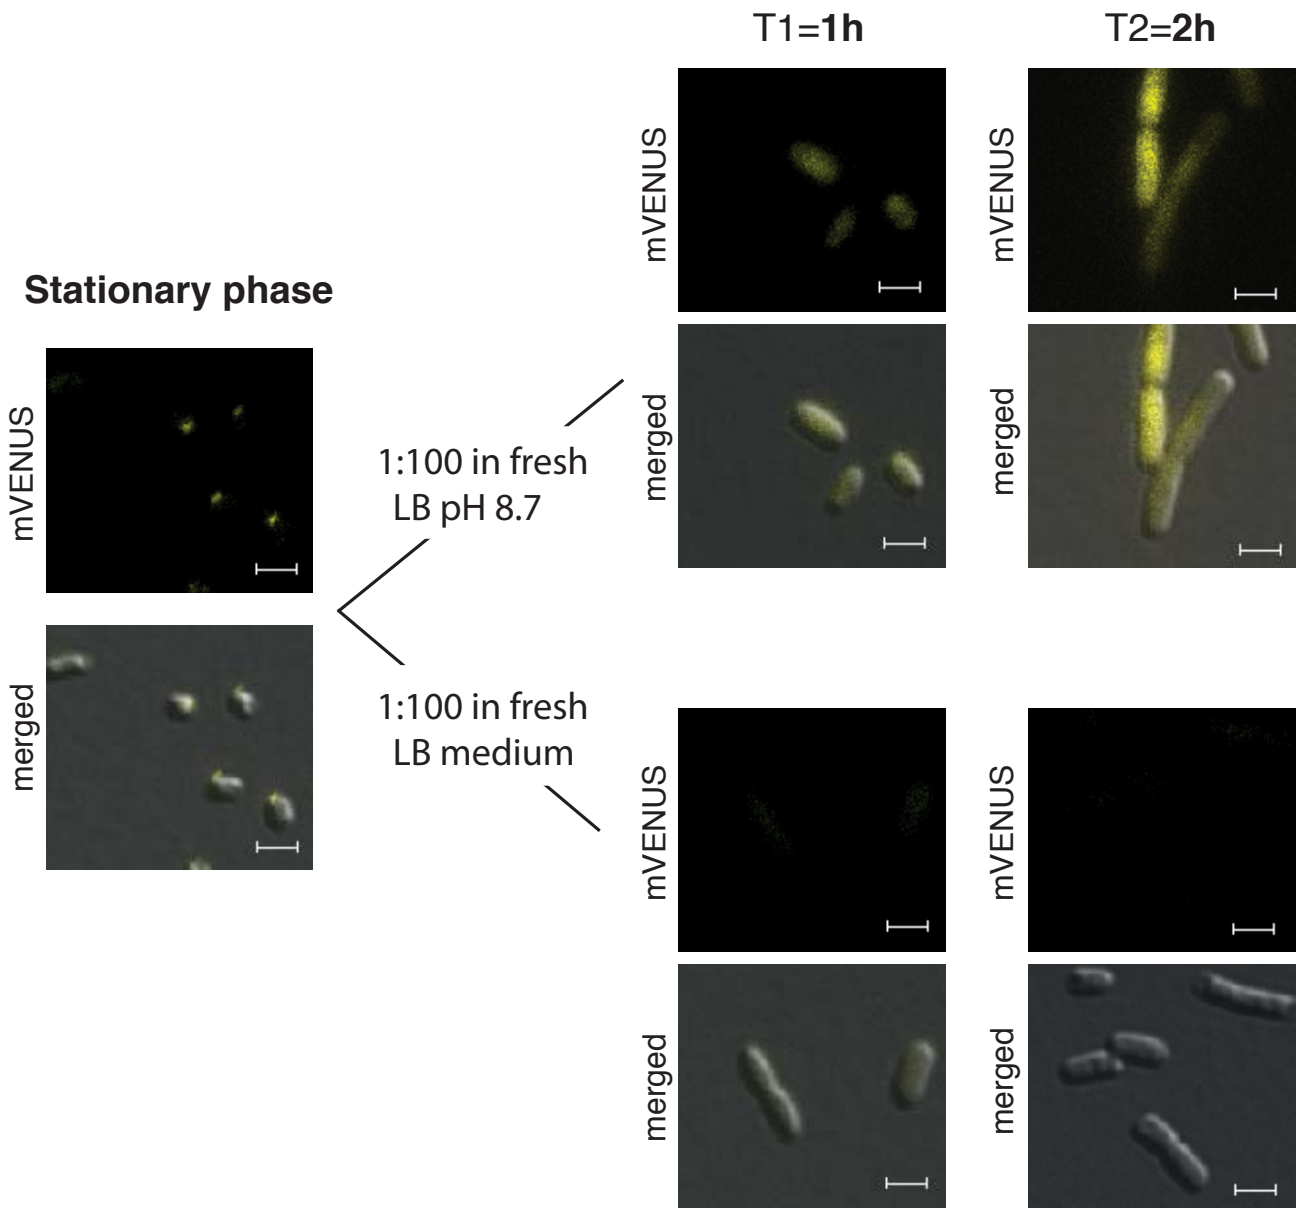

FIG S5 Localization and signal intensity of DgcZ-mVENUS upon dilution of bacterial cultures in fresh LB medium. (A) The *dgcZ-mVENUS/csrA::Tn5* strain was grown in 3 ml LB medium at 37 °C for 24 hours until stationary phase and then resuspended (1:100 ratio) in buffered (K<sub>2</sub>HPO<sub>4</sub> 50 mM, KH<sub>2</sub>PO<sub>4</sub> 15 mM) LB medium at pH 8.7 or in (unbuffered) LB medium. Tubes were then placed back to 37 °C under shaking conditions for 2 hours. After 1 and 2 hours microscopy pictures were taken. Size bars are 2 μm and are identical in each picture.



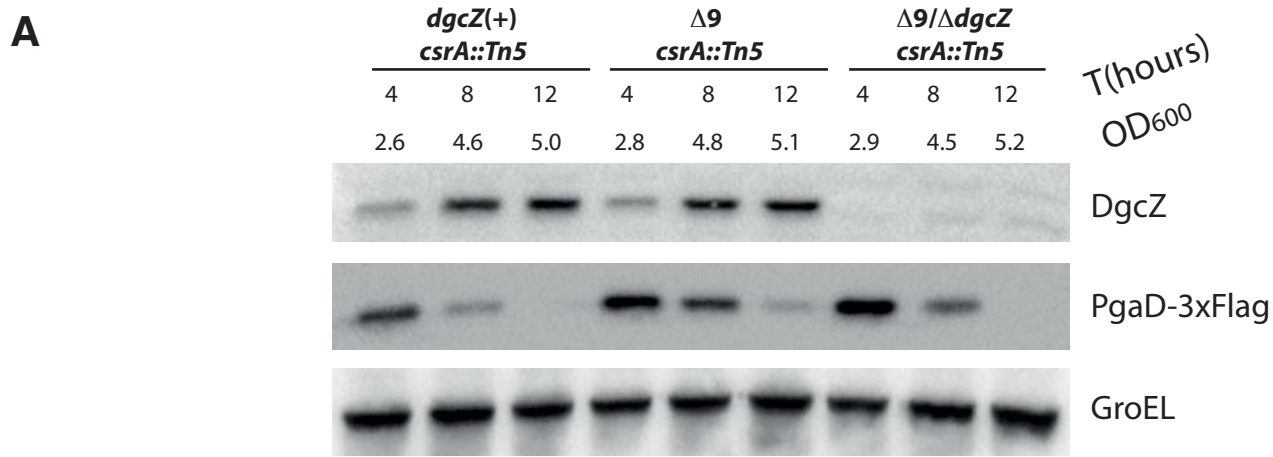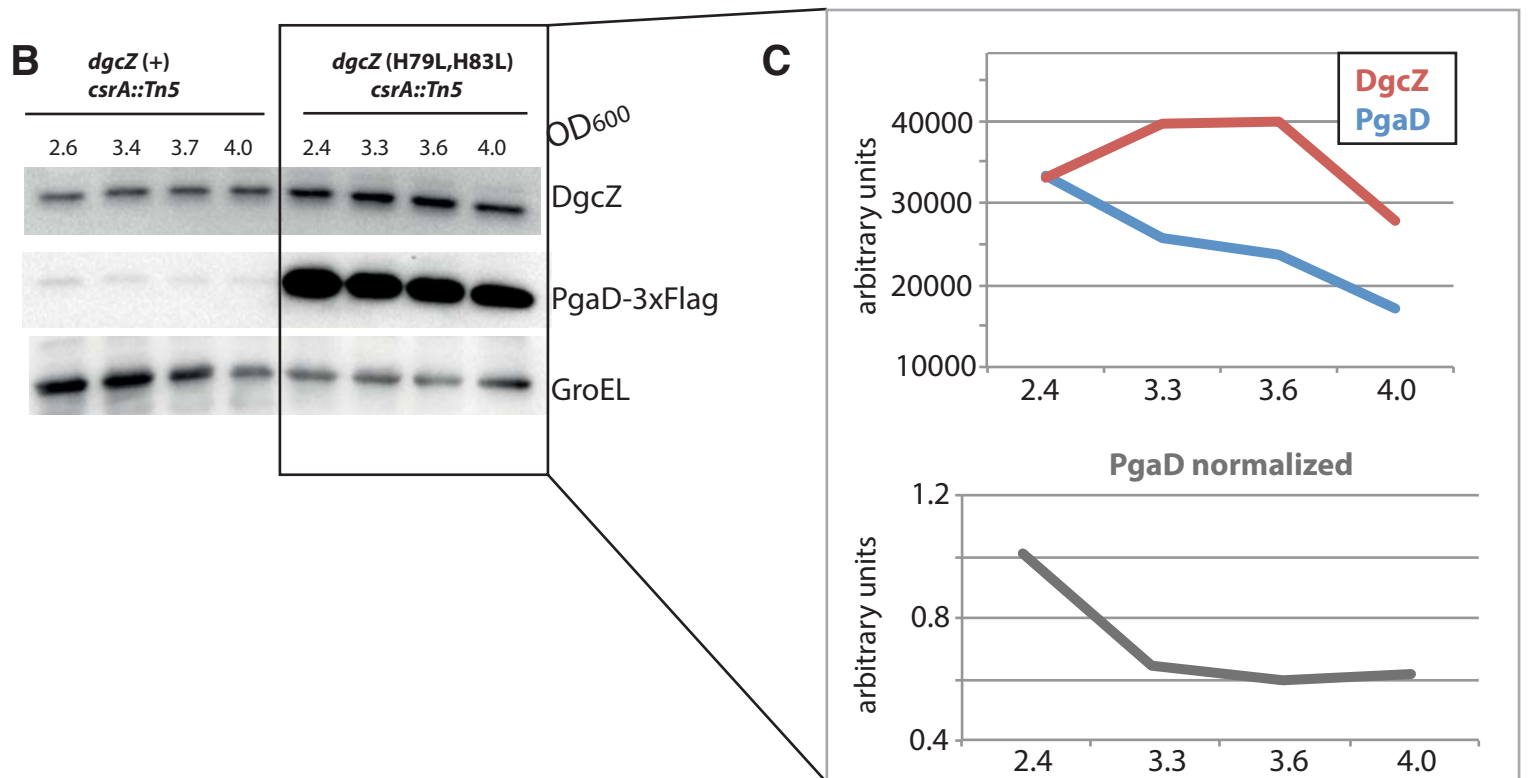

FIG S6 Detection of PgaD levels in *dgcZ(+)*, *dgcZ(H79L,H83L)*,  $\Delta 9$  and  $\Delta 9/\Delta dgcZ$  strains. (A) Western blot detection of DgcZ, PgaD-3xFlag and GroEL proteins in the *dgcZ(+)*,  $\Delta 9$  and  $\Delta 9/\Delta dgcZ$  strains in the *pgaD-3xFlag/csrA::Tn5* background. Strains were grown under shaking conditions in LB medium at 37 °C. (B) Western blot detection of DgcZ, PgaD-3xFlag and GroEL protein extracted from the *pgaD-3xFlag/csrA::Tn5* strains carrying either *dgcZ(wt)* or the *dgcZ(H79L,H83L)* allele. Strains were grown as described in (A). (C) Western blot quantification. Intensities of DgcZ and PgaD bands are shown in the upper chart. The chart at the bottom shows PgaD-normalized values obtained dividing PgaD by DgcZ signals. Intensities of DgcZ bands were quantified using ImageJ.

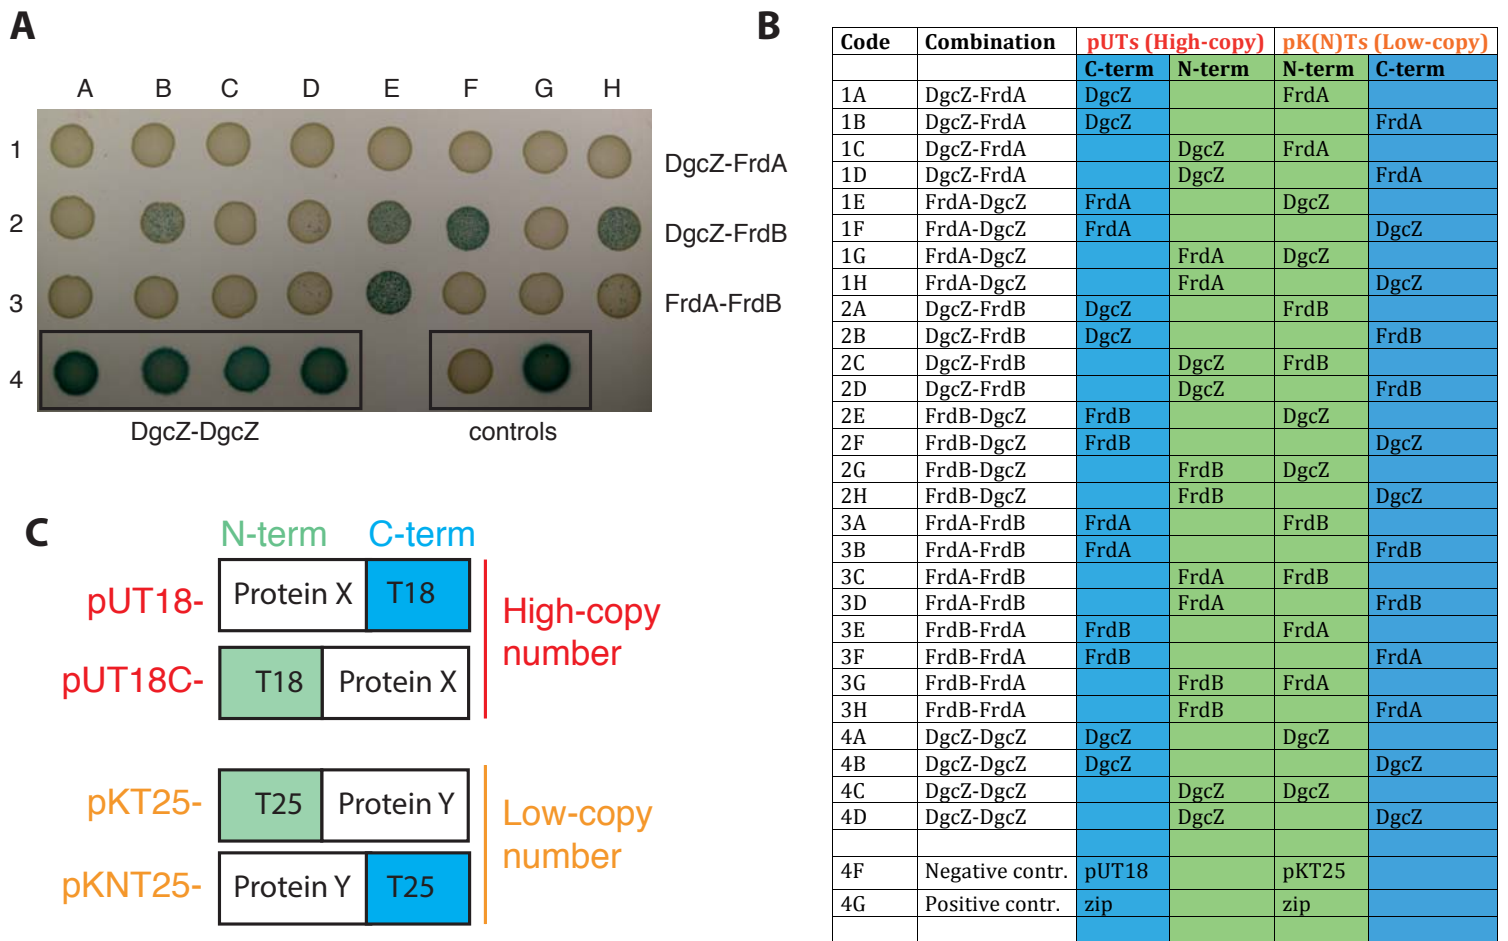

FIG S7 Bacterial two-hybrid assay. (A) Validation of interactions between DgcZ and FrdA-B. N- (N-term) and C- terminal (C-term) fusions of the proteins were constructed and all combinations were tested. Growth conditions are indicated in Materials and Methods. (B) Combinations used in panel A. (C) Schematic representation of plasmid features.

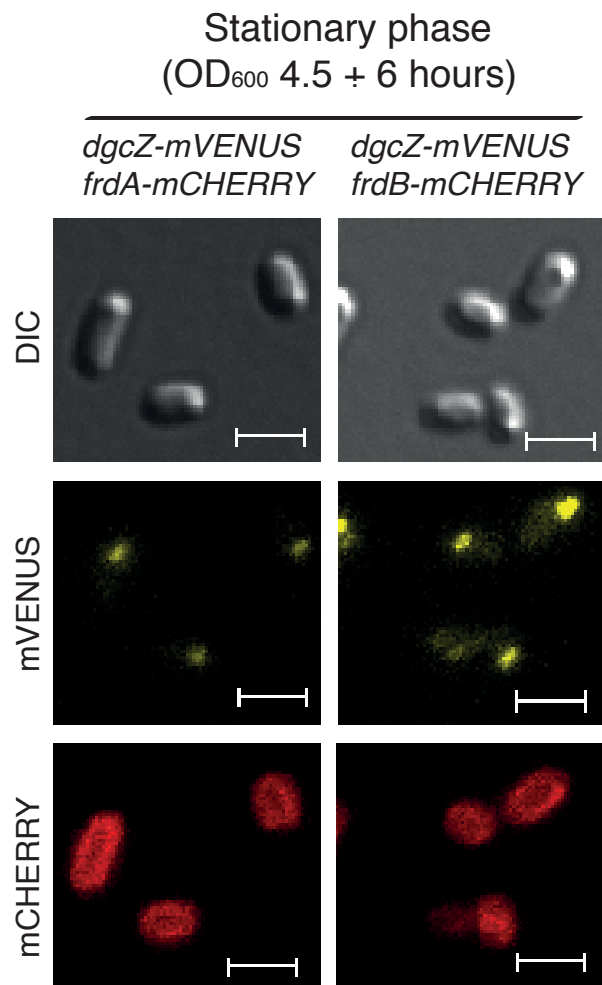

FIG S8 Fluorescence microscopy of strains expressing *dgcZ-mVENUS* and *frdA-B-mCHERRY*. *E. coli csrA::Tn5* cells carrying chromosomally integrated *dgcZ-mVENUS* and either *frdA-mCHERRY* or *frdB-mCHERRY* were grown in LB medium at 37 °C and microscopic images were taken in the stationary growth phase. Size bars are 2µm.

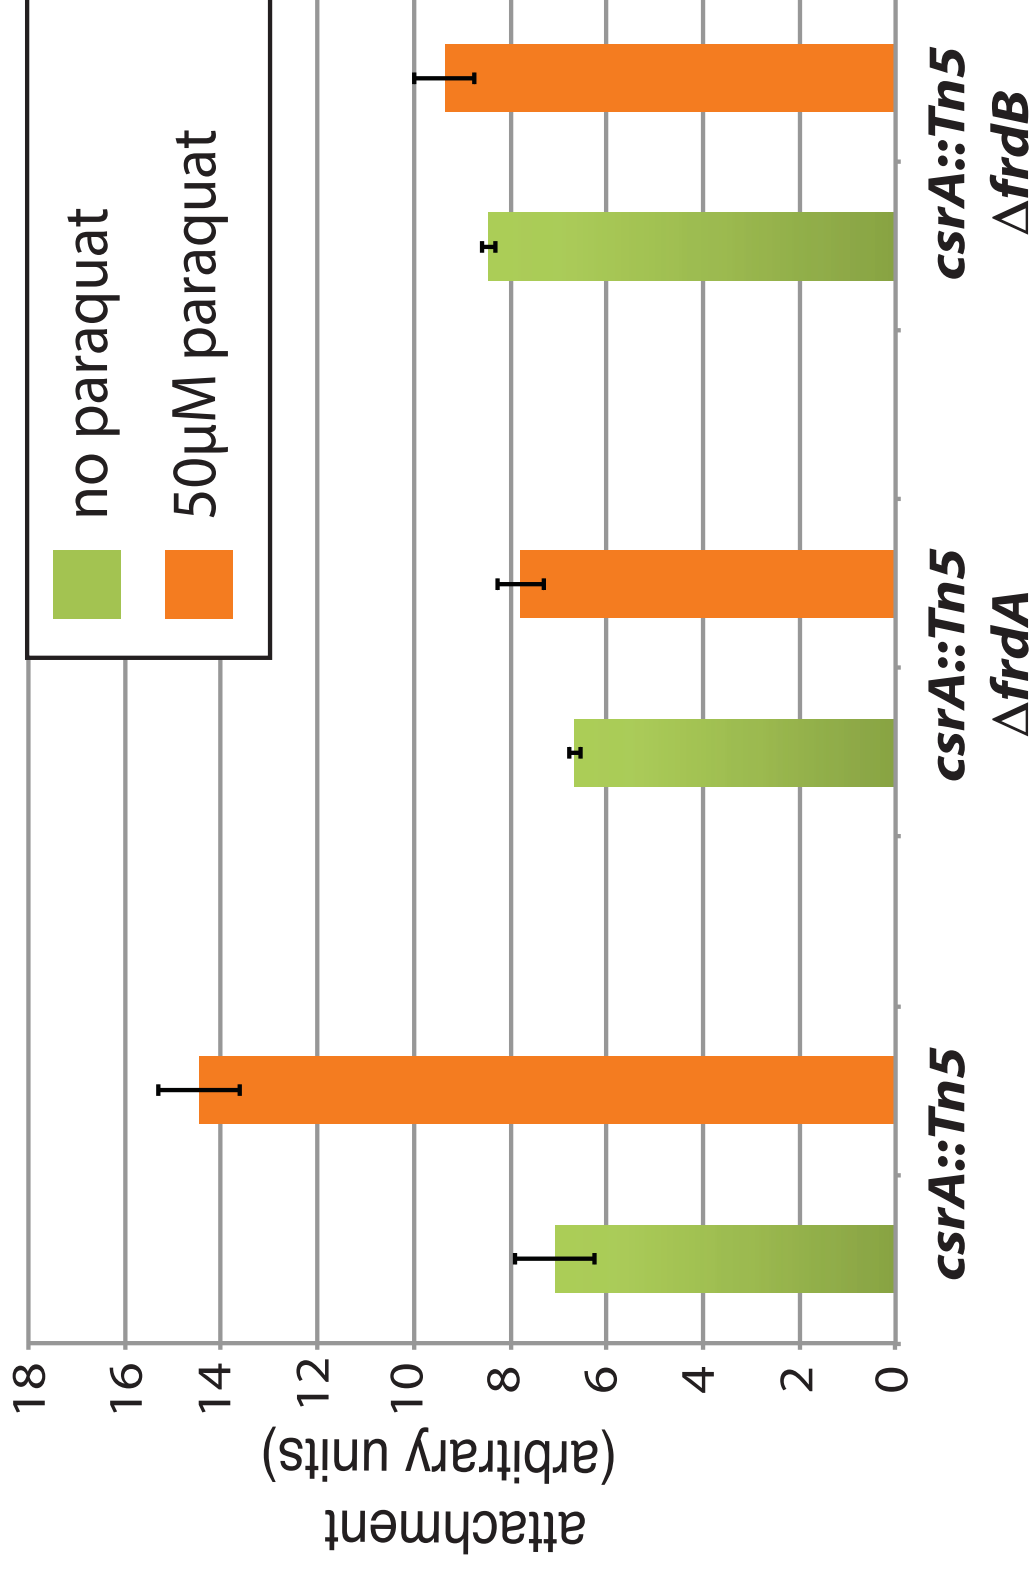

FIG S9 Effects of paraquat on biofilm formation of the *csrA::Tn5*, *csrA::Tn5/ΔfrdA* and *csrA::Tn5/ΔfrdB* strains. Attachment of the *csrA::Tn5/ΔfrdB* strain is compared with attachment of the *csrA::Tn5* and of the *csrA::Tn5/ΔfrdA* strains, shown in figure 7A. LB medium was supplemented with 0 or 50 µM paraquat. All strains were grown on the same 96-well plate. Results are averages of 5 wells inoculated with single colonies. Error bars are SEM.

**VIDEO S1 (accompanying video file) Time-lapse microscopy for localization of DgcZ-mVENUS protein in bacteria grown in microfluidic chambers.** The video shows the DgcZ localization in the *dgcZ-mVENUS/ibpA-mCHERRY/csrA::Tn5* strain. Each frame shows a merged image (phase contrast and mVENUS channel). Images were taken every 12 minutes. Bacteria were flushed into the microfluidic chamber and LB medium was applied for 2 hours (not shown here). A gradient from fresh to nutrient-depleted (spent) medium was applied (3 h, frame 0 - 15), followed by 16 h of growth in spent medium (frame 16 - 95), 1 h of gradient from spent to fresh medium (frame 95 - 100) and 20 h of fresh medium (frame 101 - 200).
